# Supplementary material for: Herpes Simplex Virus Infection Alters the Immunological Properties of Adipose-Tissue-Derived Mesenchymal-Stem Cells
Source: MDPI journal article supplement (doi:10.3390/ijms241511989), 2023-07-26
Supplement: s1 [file s1]

# Herpes Simplex Virus Infection Alters the Immunological Properties of Adipose-Tissue-Derived Mesenchymal Stem-like Cells

Anikó Kun-Varga<sup>1,2#</sup>, Barbara Gubán<sup>1#</sup>, Vanda Miklós<sup>3</sup>, Shahram Parvaneh<sup>4</sup>, Melinda Guba<sup>1,5</sup>, Szűcs Diána<sup>1,5</sup>, Tamás Monostori<sup>1,5</sup>, János Varga<sup>6</sup>, Ákos Varga<sup>6</sup>, Zsolt Rázga<sup>7†</sup>, Zsuzsanna Bata-Csörgő<sup>4</sup>, Lajos Kemény<sup>1,4,5</sup>, Klára Megyeri<sup>8</sup>, Zoltán Veréb<sup>1,3,5\*</sup>

## Supplementary Information

### Materials and methods

#### *Differentiation*

To do the trilineage differentiation, after the trypsinization of the cells, they were counted using EVE automatic cell counter. NanoEntek (NanoEntek, Seoul, Korea) and 50.000 cells were seeded in 24-well plates. The isolated cells were applied to commercially available Gibco's StemPro® Adipogenesis, Osteogenesis, and Chondrogenesis Differentiation Kits according to the manufacturer's guidelines (Gibco). After 24 hours, the medium was replaced with a differentiation medium. After 21 days, cells were fixed with 4% methanol-free formaldehyde (Molar Chemicals, Hungary) for 20 min at RT. In the differentiated adipocytes, Nile red staining was used to detect the lipid-laden particles. Alizarin red staining was applied to quantify the mineral deposits during osteogenesis. And Toluidine blue staining was used to label the chondrogenic mass formed by AD-MSC.

#### *RNA-seq analysis*

enrichplot: Yu G (2022). *enrichplot: Visualization of Functional Enrichment Result*. R package version 1.16.1. <https://yulab-smu.top/biomedical-knowledge-mining-book/>.

GOSemSim:

- Guangchuang Yu. Gene Ontology Semantic Similarity Analysis Using GOSemSim. In: Kidder B. (eds) Stem Cell Transcriptional Networks. Methods in Molecular Biology. 2020. 2117:207-215. Humana, New York, NY. doi:10.1007/978-1-0716-0301-7\_11

- Guangchuang Yu, Fei Li, Yide Qin, Xiaochen Bo, Yibo Wu, Shengqi Wang. GOSemSim: an R package for measuring semantic similarity among GO terms and gene products Bioinformatics 2010. 26(7):976-978. doi:10.1093/bioinformatics/btq064

rrvgo:

Sayols S (2020). *rrvgo: a Bioconductor package to reduce and visualize Gene Ontology terms*. <https://ssayols.github.io/rrvgo>.

EnhancedVolcano:

Blighe K. Rana S. Lewis M (2022). *EnhancedVolcano: Publication-ready volcano plots with enhanced coloring and labeling*. R package version 1.14.0

| Donor | Age | Sex (M/F) |
|-------|-----|-----------|
| 1     | 40  | M         |
| 2     | 35  | M         |
| 3     | 34  | M         |
| 4     | 47  | M         |
| 5     | 51  | F         |
| 6     | 53  | F         |
| 7     | 42  | F         |
| 8     | 25  | M         |
| 9     | 65  | F         |
| 10    | 36  | M         |
| 11    | 46  | F         |
| 12    | 53  | M         |
| 13    | 41  | F         |
| 14    | 39  | F         |

**Table S1. Details of donors used in this study.**

| Surface marker | Mean (% of positive cells) | SEM (+/-)   |
|----------------|----------------------------|-------------|
| CD6            | 2.58                       | 0.88        |
| <b>CD29</b>    | <b>98.74</b>               | <b>0.25</b> |
| CD31           | 0.05                       | 0.03        |
| <b>CD34</b>    | <b>0.00</b>                | <b>0.00</b> |
| CD40           | 3.14                       | 2.35        |
| <b>CD44</b>    | <b>90.39</b>               | <b>2.15</b> |
| CD47           | 95.79                      | 0.64        |
| CD49A          | 93.61                      | 1.51        |
| CD49D          | 29.04                      | 13.51       |
| CD50           | 8.31                       | 7.27        |
| CD51           | 87.12                      | 2.49        |
| CD54           | 17.49                      | 6.22        |
| CD61           | 38.45                      | 15.59       |
| <b>CD73</b>    | <b>98.80</b>               | <b>0.19</b> |
| <b>CD90</b>    | <b>92.45</b>               | <b>0.89</b> |
| <b>CD105</b>   | <b>90.59</b>               | <b>3.09</b> |
| CD106          | 0.47                       | 0.43        |
| CD112          | 89.39                      | 1.90        |
| CD144          | 49.02                      | 12.66       |
| CD146          | 1.82                       | 1.11        |
| <b>CD166</b>   | <b>96.22</b>               | <b>0.44</b> |
| CD271          | 14.87                      | 10.84       |
| CD304          | 0.85                       | 0.75        |
| CD325          | 26.81                      | 12.96       |
| HLA-DR         | 0.69                       | 0.24        |

**Table S2. Surface marker pattern of in vitro cultured ADMSCs.**

Multicolor flow cytometry carried out surface markers' profiling of the in vitro cultured ADCMSCs. Cells showed high expression of well-known MSC markers such as CD29. CD44. CD73. CD90. and CD105 (Data shown are mean $\pm$ SEM, N=14).



| Top Tox Functions                                |                                          |                                                 |             |
|--------------------------------------------------|------------------------------------------|-------------------------------------------------|-------------|
| Strain                                           | Name                                     | p-value range                                   | # Molecules |
| <b>Assays: Clinical Chemistry and Hematology</b> |                                          |                                                 |             |
| HSV-1 KOS                                        | Increased Levels of Hematocrit           | $5.46 \times 10^{-06}$ - $5.46 \times 10^{-06}$ | 33          |
|                                                  | Increased Levels of Red Blood Cells      | $4.79 \times 10^{-01}$ - $1.86 \times 10^{-04}$ | 33          |
|                                                  | Decreased Levels of Albumin              | $6.24 \times 10^{-01}$ - $1.50 \times 10^{-01}$ | 7           |
|                                                  | Increased Levels of Albumin              | $5.58 \times 10^{-01}$ - $1.50 \times 10^{-01}$ | 4           |
|                                                  | Increased Levels of Alkaline Phosphatase | $2.01 \times 10^{-01}$ - $1.53 \times 10^{-01}$ | 17          |
| HSV-1- 532                                       | Increased Levels of Hematocrit           | $5.24 \times 10^{-03}$ - $5.24 \times 10^{-03}$ | 13          |
|                                                  | Increased Levels of Red Blood Cells      | $2.13 \times 10^{-01}$ - $3.96 \times 10^{-02}$ | 12          |
|                                                  | Decreased Levels of Albumin              | $3.02 \times 10^{-01}$ - $5.82 \times 10^{-02}$ | 1           |
|                                                  | Increased Levels of Albumin              | $5.13 \times 10^{-01}$ - $5.82 \times 10^{-02}$ | 2           |
|                                                  | Increased Levels of Alkaline Phosphatase | $2.59 \times 10^{-01}$ - $1.33 \times 10^{-01}$ | 8           |
| HSV-2                                            | Increased Levels of ALT                  | $9.26 \times 10^{-02}$ - $9.26 \times 10^{-02}$ | 1           |
|                                                  | Increased Levels of Alkaline Phosphatase | $2.26 \times 10^{-01}$ - $2.26 \times 10^{-01}$ | 1           |
| <b>Cardiotoxicity</b>                            |                                          |                                                 |             |
| HSV-1 KOS                                        | Cardiac Enlargement                      | $1.00 \times 10^{00}$ - $1.08 \times 10^{-03}$  | 159         |
|                                                  | Cardiac Infarction                       | $1.00 \times 10^{00}$ - $1.29 \times 10^{-03}$  | 79          |
|                                                  | Congenital Heart Anomaly                 | $1.00 \times 10^{00}$ - $3.85 \times 10^{-03}$  | 83          |
|                                                  | Cardiac Hypoplasia                       | $4.79 \times 10^{-01}$ - $5.66 \times 10^{-03}$ | 17          |
|                                                  | Cardiac Necrosis/Cell Death              | $5.25 \times 10^{-01}$ - $1.21 \times 10^{-02}$ | 65          |
| HSV-1- 532                                       | Cardiac Enlargement                      | $1.00 \times 10^{00}$ - $3.38 \times 10^{-03}$  | 55          |
|                                                  | Cardiac Necrosis/Cell Death              | $1.00 \times 10^{00}$ - $9.75 \times 10^{-03}$  | 24          |
|                                                  | Cardiac Dilation                         | $1.00 \times 10^{00}$ - $1.45 \times 10^{-02}$  | 26          |
|                                                  | Cardiac Inflammation                     | $1.00 \times 10^{00}$ - $1.56 \times 10^{-02}$  | 12          |
|                                                  | Cardiac Proliferation                    | $2.82 \times 10^{-01}$ - $1.68 \times 10^{-02}$ | 17          |
| HSV-2                                            | Cardiac Dilation                         | $4.74 \times 10^{-01}$ - $3.23 \times 10^{-03}$ | 3           |
|                                                  | Cardiac Enlargement                      | $4.74 \times 10^{-01}$ - $3.23 \times 10^{-03}$ | 4           |
|                                                  | Cardiac Proliferation                    | $7.54 \times 10^{-02}$ - $1.67 \times 10^{-02}$ | 3           |
|                                                  | Cardiac Dysfunction                      | $2.56 \times 10^{-02}$ - $2.56 \times 10^{-02}$ | 1           |
|                                                  | Cardiac Stenosis                         | $1.77 \times 10^{-01}$ - $3.18 \times 10^{-02}$ | 1           |
| <b>Hepatotoxicity</b>                            |                                          |                                                 |             |
| HSV-1 KOS                                        | Liver Hyperplasia/Hyperproliferation     | $1.00 \times 10^{00}$ - $1.69 \times 10^{-37}$  | 1617        |
|                                                  | Hepatocellular carcinoma                 | $5.10 \times 10^{-01}$ - $2.11 \times 10^{-14}$ | 489         |
|                                                  | Liver Necrosis/Cell Death                | $4.79 \times 10^{-01}$ - $1.19 \times 10^{-04}$ | 78          |
|                                                  | Liver Inflammation/Hepatitis             | $1.00 \times 10^{00}$ - $1.22 \times 10^{-04}$  | 116         |
|                                                  | Liver Fibrosis                           | $1.00 \times 10^{00}$ - $1.76 \times 10^{-04}$  | 107         |
| HSV-1- 532                                       | Liver Hyperplasia/Hyperproliferation     | $1.00 \times 10^{00}$ - $1.55 \times 10^{-16}$  | 638         |
|                                                  | Hepatocellular carcinoma                 | $1.00 \times 10^{00}$ - $4.77 \times 10^{-05}$  | 183         |
|                                                  | Liver Inflammation/Hepatitis             | $1.00 \times 10^{00}$ - $6.83 \times 10^{-05}$  | 44          |
|                                                  | Liver Steatosis                          | $1.00 \times 10^{00}$ - $6.83 \times 10^{-05}$  | 50          |
|                                                  | Liver Necrosis/Cell Death                | $3.47 \times 10^{-01}$ - $1.28 \times 10^{-04}$ | 36          |
| HSV-2                                            | Liver Inflammation/Hepatitis             | $2.18 \times 10^{-01}$ - $1.25 \times 10^{-08}$ | 11          |
|                                                  | Liver Steatosis                          | $2.18 \times 10^{-01}$ - $1.25 \times 10^{-08}$ | 10          |
|                                                  | Liver Necrosis/Cell Death                | $1.13 \times 10^{-01}$ - $1.98 \times 10^{-03}$ | 5           |
|                                                  | Liver Damage                             | $1.08 \times 10^{-01}$ - $2.24 \times 10^{-03}$ | 5           |
|                                                  | Liver Failure                            | $3.23 \times 10^{-03}$ - $3.23 \times 10^{-03}$ | 1           |
| <b>Nephrotoxicity</b>                            |                                          |                                                 |             |
| HSV-1 KOS                                        | Renal Necrosis/Cell Death                | $1.00 \times 10^{00}$ - $7.51 \times 10^{-06}$  | 152         |
|                                                  | Renal Proliferation                      | $1.00 \times 10^{00}$ - $2.94 \times 10^{-05}$  | 80          |
|                                                  | Glomerular Injury                        | $1.00 \times 10^{00}$ - $4.22 \times 10^{-04}$  | 125         |
|                                                  | Renal Inflammation                       | $1.00 \times 10^{00}$ - $4.22 \times 10^{-04}$  | 87          |
|                                                  | Renal Nephritis                          | $1.00 \times 10^{00}$ - $4.22 \times 10^{-04}$  | 87          |
| HSV-1- 532                                       | Glomerular Injury                        | $1.00 \times 10^{00}$ - $1.96 \times 10^{-04}$  | 58          |
|                                                  | Renal Inflammation                       | $4.51 \times 10^{-01}$ - $1.96 \times 10^{-04}$ | 43          |

|       |                     |                                                 |    |
|-------|---------------------|-------------------------------------------------|----|
|       | Renal Nephritis     | $4.51 \times 10^{-01}$ - $1.96 \times 10^{-04}$ | 43 |
|       | Kidney Failure      | $1.00 \times 10^{00}$ - $5.98 \times 10^{-04}$  | 28 |
|       | Renal Fibrosis      | $1.65 \times 10^{-01}$ - $5.98 \times 10^{-04}$ | 19 |
| HSV-2 | Glomerular Injury   | $5.58 \times 10^{-01}$ - $7.18 \times 10^{-06}$ | 9  |
|       | Renal Inflammation  | $3.18 \times 10^{-02}$ - $7.18 \times 10^{-06}$ | 9  |
|       | Renal Nephritis     | $3.18 \times 10^{-02}$ - $7.18 \times 10^{-06}$ | 9  |
|       | Renal Damage        | $6.87 \times 10^{-02}$ - $7.54 \times 10^{-04}$ | 3  |
|       | Renal Tubule Injury | $6.87 \times 10^{-02}$ - $7.54 \times 10^{-04}$ | 3  |

**Table S3. Top TOX functions determined by IPA**

| Top Regulator Effect Networks |                           |                                                                                                                        |                                        |                   |
|-------------------------------|---------------------------|------------------------------------------------------------------------------------------------------------------------|----------------------------------------|-------------------|
| Strain                        | ID                        | Regulators                                                                                                             | Disease & Functions                    | Consistency Score |
| HSV1-KOS                      | 1                         | SPDEF                                                                                                                  | Migration of cells                     | 3.5               |
|                               | 2                         | Eldr                                                                                                                   | Cell proliferation of tumor cell lines | 3.464             |
|                               | 3                         | LARP1                                                                                                                  | Cell death of tumor                    | 3.328             |
|                               | 4                         | LARP1                                                                                                                  | Cell death of tumor cells              | 3.328             |
|                               | 5                         | LARP1                                                                                                                  | Necrosis of tumor                      | 3.328             |
| HSV1- 532                     | 1                         | poly rI:rC-RNA                                                                                                         | Replication of Herpesviridae           | 3.474             |
|                               | 2                         | IRF3                                                                                                                   | Replication of Herpesviridae           | 3.317             |
|                               | 3                         | IFNA2                                                                                                                  | Replication of Herpesviridae           | 3.175             |
|                               | 4                         | IRF7                                                                                                                   | Transactivation                        | 3.162             |
|                               | 5                         | IRF7                                                                                                                   | Transactivation of RNA                 | 3.162             |
| HSV-2                         | 1                         | SP110                                                                                                                  | Viral Infection                        | 3.015             |
|                               | 2                         | IFNG                                                                                                                   | Cell death of epithelial cells         | 3.0               |
|                               | 3                         | IRF3                                                                                                                   | Cell death of epithelial cells         | 3.0               |
|                               | 4                         | Interferon alpha                                                                                                       | Cell death of epithelial cells         | 3.0               |
|                               | 5                         | NONO                                                                                                                   | Cell death of epithelial cells         | 3.0               |
| Top Networks                  |                           |                                                                                                                        |                                        |                   |
| HSV1-KOS                      | ID                        | Associated Network Functions                                                                                           |                                        | Score             |
|                               | 1                         | Cell Death and Survival. Cardiovascular Disease. Cellular Movement                                                     |                                        | 35                |
|                               | 2                         | Cell Morphology. Cellular Function. and Maintenance. Metabolic Disease                                                 |                                        | 35                |
|                               | 3                         | Cancer. Cell Death. and Survival. Organismal Injury. and Abnormalities                                                 |                                        | 35                |
|                               | 4                         | Post-Translational Modification. Protein Folding. Developmental Disorder                                               |                                        | 35                |
|                               | 5                         | Cell-To-Cell Signaling and Interaction. Cellular Assembly and Organization. Tissue Development                         |                                        | 33                |
| HSV1- 532                     | 1                         | Cellular Assembly and Organization. DNA Replication. Recombination. and Repair. Cellular Function and Maintenance      |                                        | 50                |
|                               | 2                         | Cellular Assembly and Organization. Cellular Function. and Maintenance. Molecular Transport                            |                                        | 47                |
|                               | 3                         | RNA Damage and Repair. Cellular Function and Maintenance. Dermatological Diseases. and Conditions                      |                                        | 47                |
|                               | 4                         | RNA Post- Transcriptional Modification. Cancer. DNA Replication. Recombination. and Repair                             |                                        | 44                |
|                               | 5                         | RNA Post- Transcriptional Modification. Endocrine System Disorders. Hereditary Disorder                                |                                        | 44                |
| HSV2                          | 1                         | Immunological Disease. Inflammatory Disease. Organismal Injury. and Abnormalities                                      |                                        | 45                |
|                               | 2                         | Antimicrobial Response. Inflammatory Response. Cell Signaling                                                          |                                        | 36                |
|                               | 3                         | Antimicrobial Response. Inflammatory Response. Hereditary Disorder                                                     |                                        | 34                |
|                               | 4                         | Immunological Disease. Inflammatory Disease. Organismal Injury. and Abnormalities                                      |                                        | 28                |
|                               | 5                         | Cell-To-Cell Signaling and Interaction. Cellular Growth and Proliferation. Connective Tissue Development. and Function |                                        | 19                |
| Top Tox Lists                 |                           |                                                                                                                        |                                        |                   |
| HSV1-KOS                      | Name                      |                                                                                                                        | p-value                                | Overlap           |
|                               | Mitochondrial Dysfunction |                                                                                                                        | 6.00x10 <sup>-12</sup>                 | 36.3 % 62/171     |
|                               | Renal Necrosis/Cell Death |                                                                                                                        | 2.30x10 <sup>-08</sup>                 | 23.1 % 152/659    |
|                               | Liver Necrosis/Cell Death |                                                                                                                        | 1.39x10 <sup>-04</sup>                 | 22.5 % 78/347     |

|                              |                                                                     |                        |               |
|------------------------------|---------------------------------------------------------------------|------------------------|---------------|
| HSV1- 532                    | Recovery from Ischemic Acute Renal Failure (Rat)                    | 3.33x10 <sup>-04</sup> | 57.1 % 8/14   |
|                              | Aryl Hydrocarbon Receptor Signaling                                 | 3.80x10 <sup>-04</sup> | 25.5 % 41/161 |
|                              | Renal Necrosis/Cell Death                                           | 1.34x10 <sup>-04</sup> | 9.4 % 62/659  |
|                              | Liver Necrosis/Cell Death                                           | 5.75x10 <sup>-04</sup> | 10.4 % 36/347 |
|                              | Mitochondrial Dysfunction                                           | 9.76x10 <sup>-04</sup> | 12.3 % 21/171 |
|                              | Recovery from Ischemic Acute Renal Failure (Rat)                    | 7.12x10 <sup>-03</sup> | 28.6 % 4/14   |
| HSV2                         | Increases Cardiac Proliferation                                     | 1.10x10 <sup>-02</sup> | 12.8 % 11/86  |
|                              | Increases Renal Nephritis                                           | 6.23x10 <sup>-05</sup> | 6.1 % (4/66)  |
|                              | Increases Liver Hepatitis                                           | 3.36x10 <sup>-04</sup> | 3.9 % (4/102) |
|                              | Increases Depolarization of Mitochondria and Mitochondrial Membrane | 1.52x10 <sup>-03</sup> | 11.1 % (2/18) |
|                              | Liver Necrosis/Cell Death                                           | 5.33x10 <sup>-03</sup> | 1.4 % (5/347) |
|                              | Increases Glomerular Injury                                         | 1.75x10 <sup>-02</sup> | 1.8 % (3/169) |
| Top Analysis-Ready Molecules |                                                                     |                        |               |
| Expr Log Ratio               |                                                                     |                        |               |
| HSV1-KOS                     | Molecules                                                           | Expr. Value            | Chart         |
|                              | CH507_528H121                                                       | 18.890                 | ↑             |
|                              | CXCL11                                                              | 10.522                 | ↑             |
|                              | RP3_453C1214                                                        | 9.921                  | ↑             |
|                              | PRAMEF1 (includes others)                                           | 9.282                  | ↑             |
|                              | CCDC194                                                             | 9.279                  | ↑             |
|                              | SOX3                                                                | 9.120                  | ↑             |
|                              | ZSCAN4                                                              | 8.982                  | ↑             |
|                              | CXCL10                                                              | 8.889                  | ↑             |
|                              | DIO3                                                                | 8.811                  | ↑             |
|                              | RP11_235E173                                                        | 8.755                  | ↑             |
|                              | TMEM205                                                             | -5.128                 | ↓             |
|                              | GPR68                                                               | -4.857                 | ↓             |
|                              | SCARA3                                                              | -4.829                 | ↓             |
|                              | GREM2                                                               | -4.816                 | ↓             |
|                              | ISLR                                                                | -4.570                 | ↓             |
|                              | PSAT1                                                               | -4.459                 | ↓             |
|                              | EMILIN1                                                             | -4.235                 | ↓             |
|                              | ZER1                                                                | -4.177                 | ↓             |
|                              | SIL1                                                                | -4.170                 | ↓             |
|                              | MORN2                                                               | -4.139                 | ↓             |
| HSV1-532                     | CH507_528H121                                                       | 20.970                 | ↑             |
|                              | CXCL11                                                              | 10.067                 | ↑             |
|                              | CXCL10                                                              | 8.526                  | ↑             |
|                              | OASL                                                                | 8.087                  | ↑             |
|                              | CCDC194                                                             | 7.748                  | ↑             |
|                              | UNCX                                                                | 7.579                  | ↑             |
|                              | RP3_453C1214                                                        | 7.339                  | ↑             |
|                              | DIO3                                                                | 7.231                  | ↑             |
|                              | USP18                                                               | 6.974                  | ↑             |
|                              | RSAD2                                                               | 6.936                  | ↑             |
|                              | BRD3OS                                                              | -2.800                 | ↓             |
|                              | GREM2                                                               | -2.784                 | ↓             |
|                              | TMEM37                                                              | -2.295                 | ↓             |
|                              | CDK5                                                                | -2.286                 | ↓             |
|                              | RPS6KA2                                                             | -2.171                 | ↓             |
|                              | ITGB1BP1                                                            | -2.154                 | ↓             |
|                              | PTPN9                                                               | -2.059                 | ↓             |
|                              | TMEM35A                                                             | -2.047                 | ↓             |
|                              | GSTA4                                                               | -2.044                 | ↓             |

|      |               |        |                                                                                     |
|------|---------------|--------|-------------------------------------------------------------------------------------|
|      | PLPP3         | -2.013 |  |
| HSV2 | CXCL11        | 9.671  |  |
|      | CH507_528H121 | 9.041  |  |
|      | CXCL10        | 7.910  |  |
|      | OASL          | 7.060  |  |
|      | IDO1          | 6.643  |  |
|      | MX1           | 6.268  |  |
|      | CMPK2         | 6.250  |  |
|      | CCDC194       | 6.106  |  |
|      | IFIT2         | 5.878  |  |
|      | RSAD2         | 5.534  |  |

**Table S4. Top networks and analysis-ready molecules determined by IPA. Green arrows indicate downregulation and red arrows indicate upregulation of genes.**

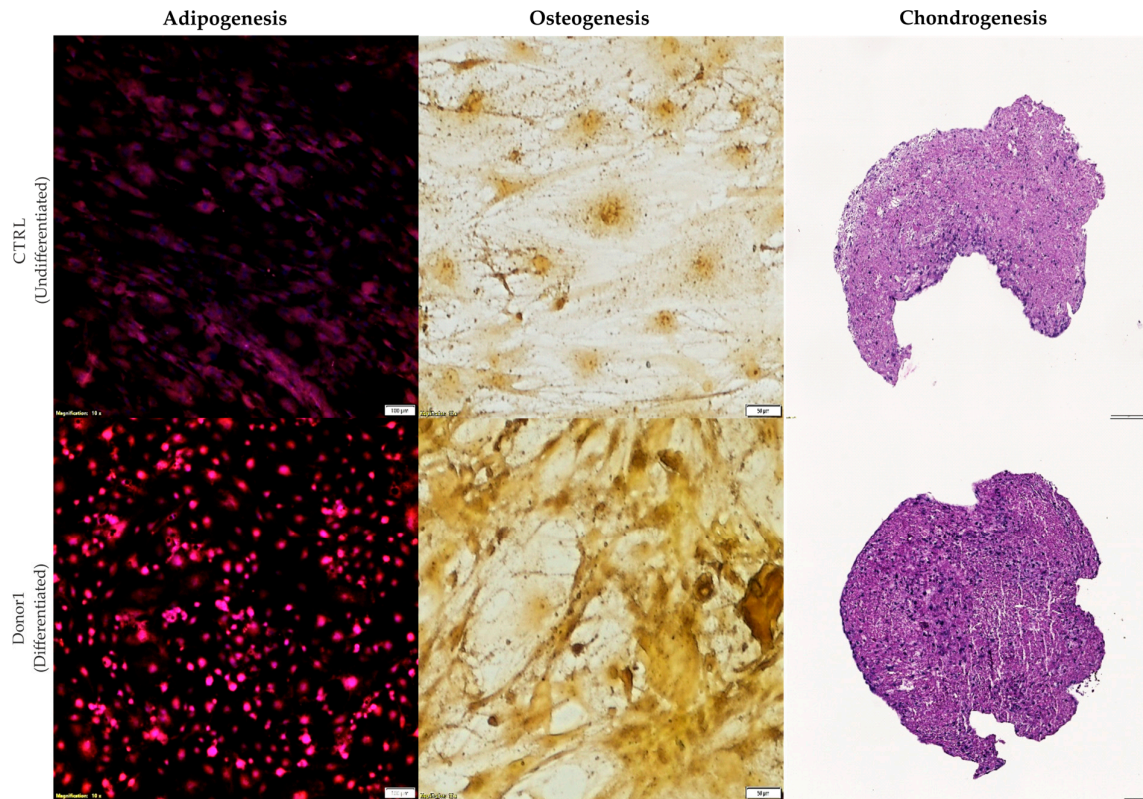

**Figure S1. Validation of the in vitro differentiation potential of AD-MSC**

MSCs isolated from adipose tissue were able to differentiate into adipose tissue in vitro, as revealed by Nile-red staining of lipid droplets in the cells. In the case of bone-directed differentiation, calcium deposits were detected by alizarin red staining. The extracellular matrix appearance characteristic of cartilage tissue was shown by metachromasia of toluidine blue staining. Results from a representative study are shown.(CT: control culture without differentiation cell culture media). Scale bar: For Adipogenesis 100um, for Osteogenesis 50 um and for chondrogenesis 200um.







HSV1 KOS

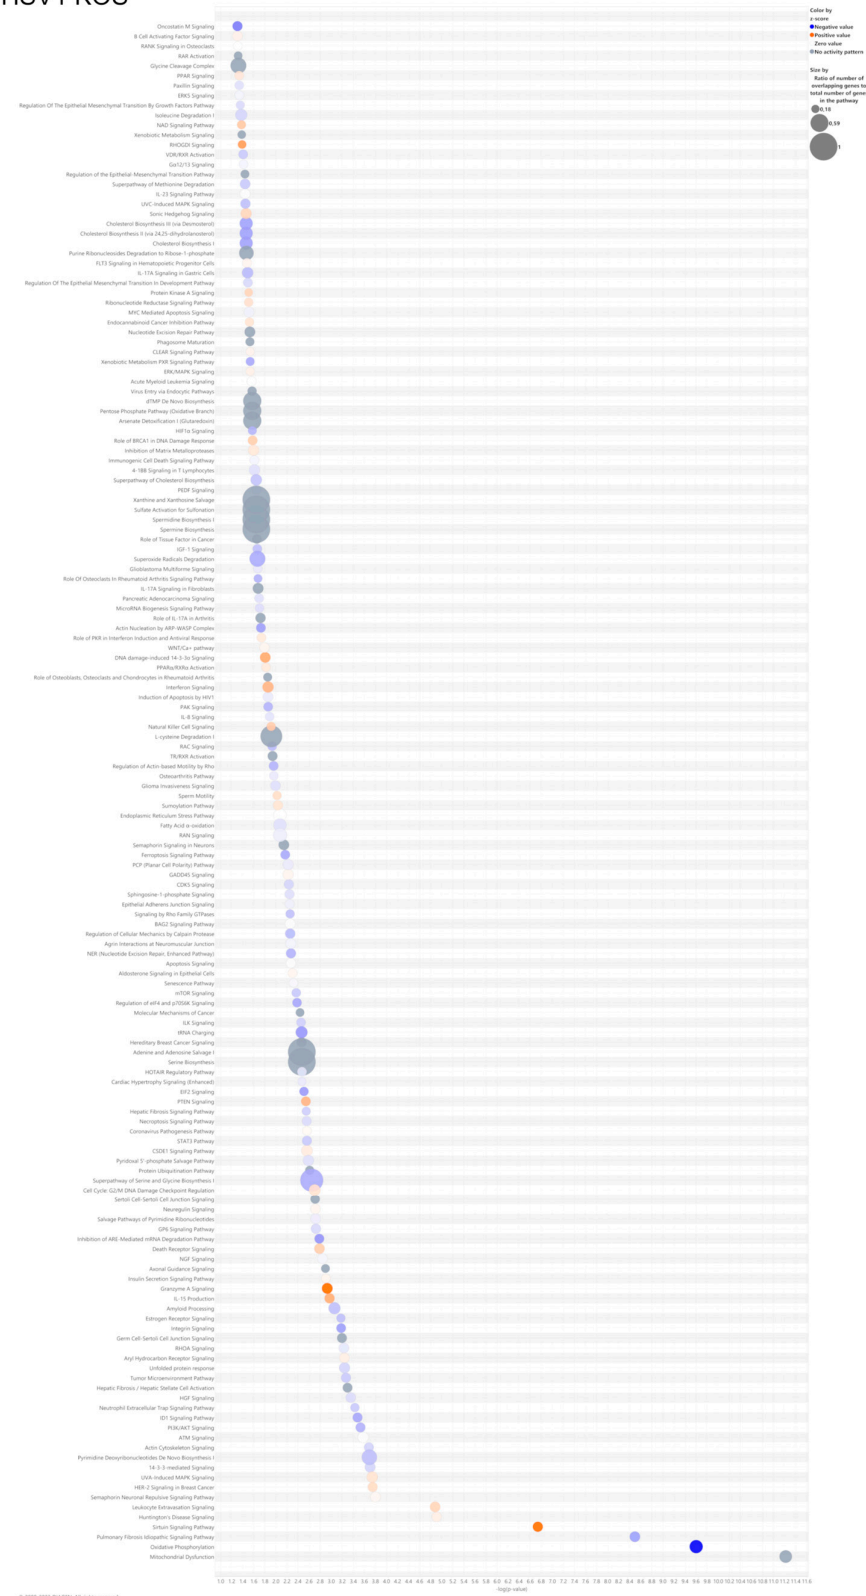

## HSV1 532

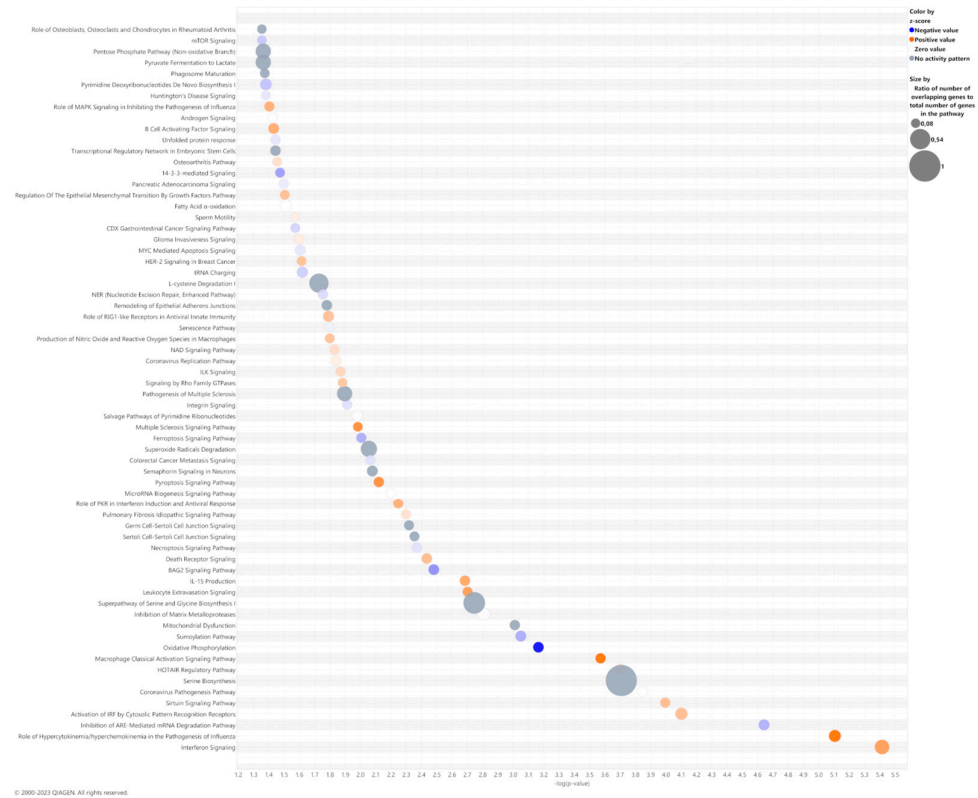

**Figure S4. Canonical pathways in HSV-1 532 infected ADMSC**  
Bubble chart of canonical pathways initiated by HSV-1 532 infection in vitro. Pathways are determined by IPA.

HSV2

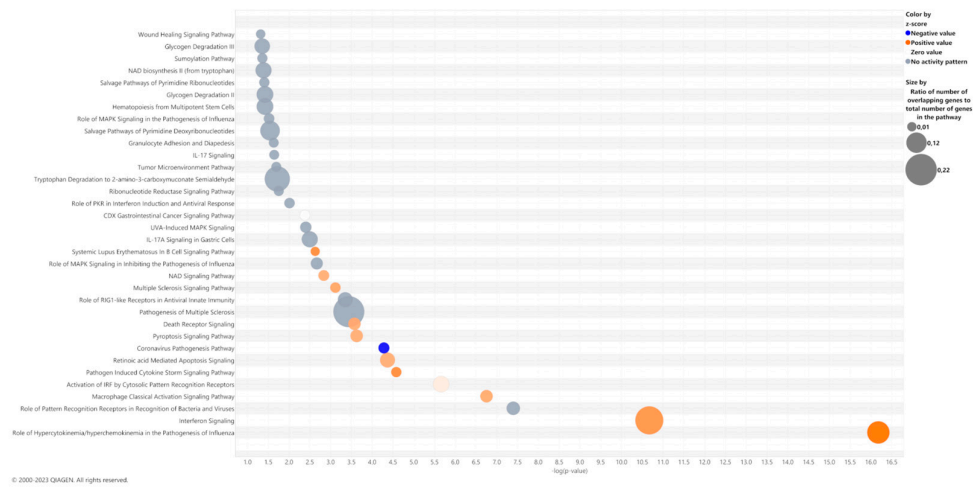

**Figure S5. Canonical pathways in HSV-2 infected ADMSC**  
Bubble chart of canonical pathways initiated by HSV-2 infection in vitro. Pathways are determined by IPA.

HSV1 KOS

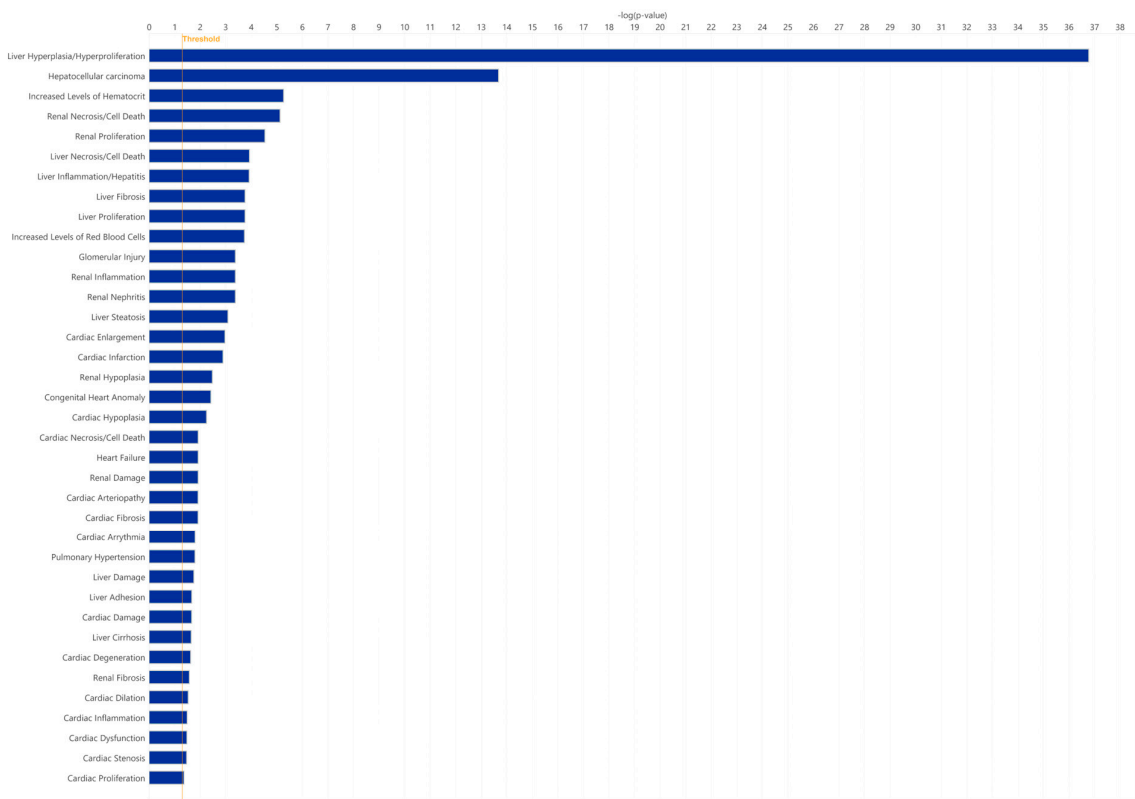

**Figure S6. TOX pathways in HSV-1 KOS infected ADMSC**  
Bar chart of TOX pathways activated by in vitro HSV-1 KOS infection in AD-MSC. Pathways were determined by IPA.

HSV1 532

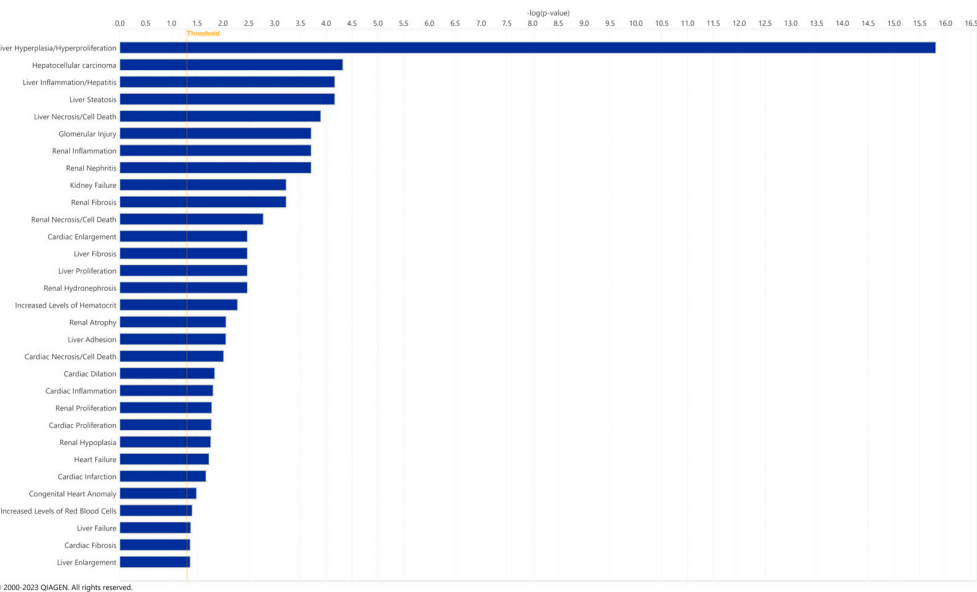

HSV2

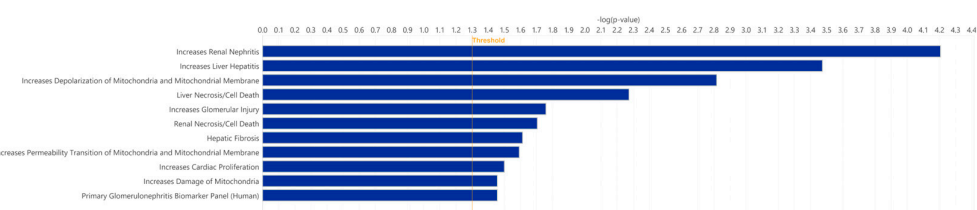

**Figure S7. TOX pathways in HSV-1 532 and HSV-2 infected ADMSC**  
Bar chart of TOX pathways activated by in vitro HSV-1 532 or HSV-2 infection in AD-MSC. Pathways were determined by IPA.

A

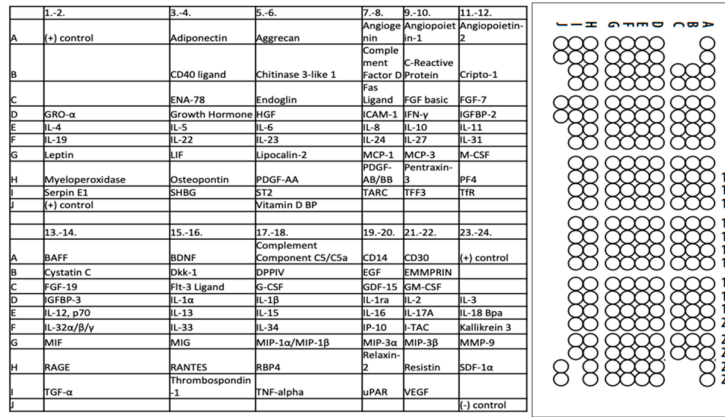

B

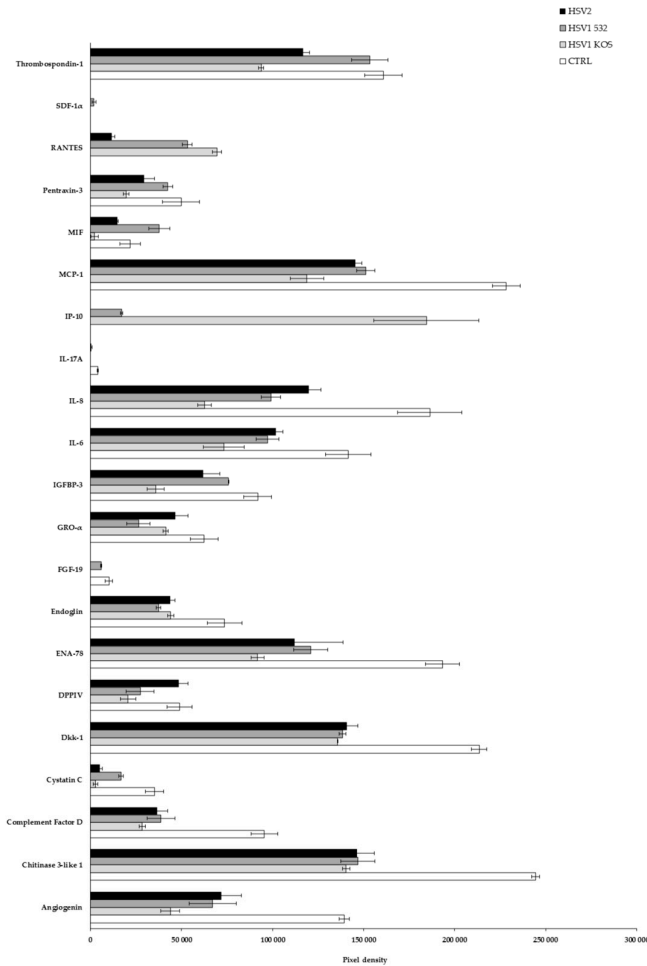

C

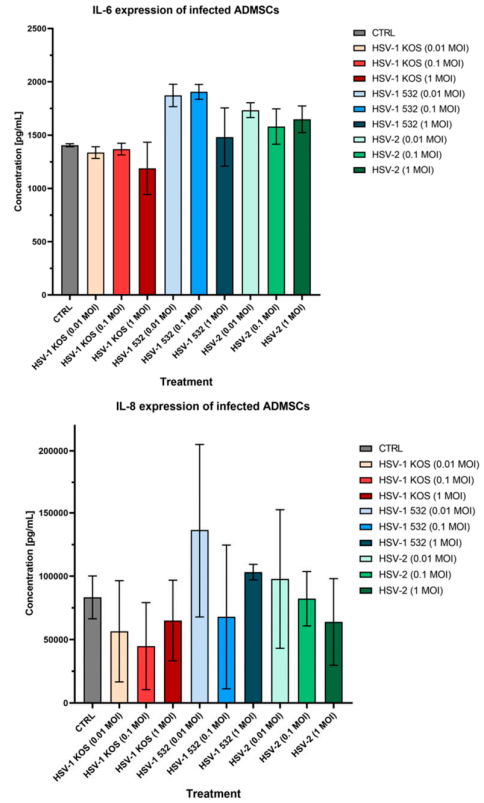

**Figure S8. Expression of cytokines released by HSV-infected and uninfected AD-MSC**

The setup of the Human XL Cytokine Proteome Profiler to identify targets in the cell culture supernatants (A). All spots were analyzed and semi-quantified by image analysis. (B) IL-6, IL-8 and IP-10 secretion were validated by ELISA. (N=3) (C)
